# Supplementary material
Source: publisher site journal article supplement (https://www.spandidos-publications.com/5282/downloadSupplementary)
Supplement: Supplementary file 1 [file downloadSupplementary]

## Sheet: common-DEGs-func
Table SIII. GO and KEGG enrichment analysis of 505 overlapped differentially expressed mRNAs.
Category	Term	Count	P-value	FDR	Genes
GOTERM_BP_DIRECT	GO:0006805~xenobiotic metabolic process	18	4.78e-11	1.24e-07	NQO1, CYP4F2, ACSM1, GLYAT, CYP3A4, CYP2C19, CYP2C18, CYP2C9, CYP26A1, ALDH3A1, CYP2A6, CYP2C8, CYP2B6, NAT2, CYP1A2, GSTA1, CYP2E1, SULT2A1
GOTERM_BP_DIRECT	GO:0019373~epoxygenase P450 pathway	10	4.41e-10	5.71e-07	CYP2C9, CYP2C8, CYP2A6, CYP2B6, CYP4F2, CYP1A2, CYP4A11, CYP2E1, CYP2C19, CYP2C18
GOTERM_BP_DIRECT	GO:0042573~retinoic acid metabolic process	10	4.8e-09	4.15e-06	CYP26A1, CYP2C8, ADH1C, ADH1B, ADH1A, BCO2, ALDH8A1, CYP3A4, CYP2C18, ADH6
GOTERM_BP_DIRECT	GO:0008202~steroid metabolic process	12	1.54e-08	1e-05	CYP2C9, CYP2C8, CYP2A6, CYP2B6, CYP3A43, AKR1D1, RDH16, AKR1C3, CYP2E1, CYP2C19, CYP3A4, SULT2A1
GOTERM_BP_DIRECT	GO:0042572~retinol metabolic process	12	3.86e-08	1.71e-05	ADH4, CYP2C8, AKR1B10, ADH1C, ADH1B, ADH1A, CYP1A2, RDH16, AKR1C3, CYP3A4, CYP2C18, ADH6
GOTERM_BP_DIRECT	GO:0071276~cellular response to cadmium ion	11	4.59e-08	1.71e-05	MT2A, MT1M, CYP1A2, AKR1C3, MT1F, MT1G, MT1H, MT1X, FOS, MT1HL1, MT1E
GOTERM_BP_DIRECT	GO:0007052~mitotic spindle organization	12	4.79e-08	1.71e-05	CENPE, STIL, CCNB1, KIF4A, NUF2, TBCE, TTK, KIF11, NDC80, DLGAP5, AURKA, SPC25
GOTERM_BP_DIRECT	GO:0010273~detoxification of copper ion	8	5.27e-08	1.71e-05	MT2A, MT1M, MT1F, MT1G, MT1H, MT1X, MT1HL1, MT1E
GOTERM_BP_DIRECT	GO:0042738~exogenous drug catabolic process	9	7.1e-08	2.04e-05	CYP2C9, CYP2C8, CYP2A6, CYP2B6, CYP1A2, CYP2E1, CYP2C19, CYP3A4, CYP2C18
GOTERM_BP_DIRECT	GO:0017144~drug metabolic process	9	1.02e-07	2.65e-05	CYP2C9, CYP2C8, CYP2A6, CYP2B6, CYP4F2, CYP1A2, CYP2E1, CYP2C19, CYP3A4
GOTERM_BP_DIRECT	GO:0045926~negative regulation of growth	8	2.18e-07	5.13e-05	MT2A, MT1M, MT1F, GPC3, MT1G, MT1H, MT1X, MT1E
GOTERM_BP_DIRECT	GO:0001676~long-chain fatty acid metabolic process	9	2.75e-07	5.94e-05	ACSL1, CYP4F2, ACSM1, CYP4A11, ACSL4, CYP2E1, CYP2C19, SLC27A2, SLC27A5
GOTERM_BP_DIRECT	GO:0071280~cellular response to copper ion	9	3.72e-07	7.41e-05	MT2A, MT1M, CYP1A2, MT1F, MT1G, MT1H, MT1X, MT1HL1, MT1E
GOTERM_BP_DIRECT	GO:0042178~xenobiotic catabolic process	8	6.91e-07	0.000128	CYP2C9, CYP2C8, CYP2A6, CYP2B6, ACSL1, CYP1A2, CYP2C19, CYP3A4
GOTERM_BP_DIRECT	GO:0051301~cell division	28	1.1e-06	0.000178	NCAPG, BUB1B, KIF11, AURKA, CDC20, CCNB2, CCNB1, PTTG1, TPR, NUF2, OIP5, NEK2, FAM83D, BUB1, HELLS, CENPW, UBE2C, CDC7, NDC80, ZWINT, CENPE, TPX2, KIF18B, CCNE2, PRC1, CDK1, KIF2C, SPC25
GOTERM_BP_DIRECT	GO:0006882~cellular zinc ion homeostasis	9	1.1e-06	0.000178	MT2A, MT1M, MT1F, SLC39A5, MT1G, MT1H, MT1X, MT1HL1, MT1E
GOTERM_BP_DIRECT	GO:0071294~cellular response to zinc ion	8	1.82e-06	0.000278	MT2A, MT1M, MT1F, MT1G, MT1H, MT1X, MT1HL1, MT1E
GOTERM_BP_DIRECT	GO:0001867~complement activation, lectin pathway	6	2.11e-06	0.000288	COLEC11, FCN2, FCN3, COLEC10, MASP2, MBL2
GOTERM_BP_DIRECT	GO:0097267~omega-hydroxylase P450 pathway	6	2.11e-06	0.000288	CYP2C9, CYP2C8, CYP4F2, CYP1A2, CYP4A11, CYP2C19
GOTERM_BP_DIRECT	GO:0016098~monoterpenoid metabolic process	5	5.43e-06	0.000703	CYP2C9, CYP1A2, CYP2E1, CYP2C19, CYP3A4
GOTERM_BP_DIRECT	GO:0000281~mitotic cytokinesis	10	7.71e-06	0.000952	ANLN, RACGAP1, KIF4A, NUSAP1, KIF23, ANK3, KIF20A, ECT2, CENPA, CEP55
GOTERM_BP_DIRECT	GO:0006082~organic acid metabolic process	7	9.01e-06	0.00106106	CYP2C9, CYP2C8, CYP2A6, CYP2B6, CYP2E1, CYP2C19, CYP2C18
GOTERM_BP_DIRECT	GO:1903028~positive regulation of opsonization	5	2.43e-05	0.00274192	COLEC11, FCN2, FCN3, COLEC10, MBL2
GOTERM_BP_DIRECT	GO:0006069~ethanol oxidation	5	4.3e-05	0.00463687	ADH4, ADH1C, ADH1B, ADH1A, ADH6
GOTERM_BP_DIRECT	GO:0015908~fatty acid transport	7	6.66e-05	0.00690454	FABP1, RBP7, FABP5, ACSL1, ACSL4, SLC27A2, MFSD2A
GOTERM_BP_DIRECT	GO:0006953~acute-phase response	8	7.11e-05	0.00708291	ITIH4, REG3A, SERPINF2, SAA4, LCN2, HAMP, ASS1, MBL2
GOTERM_BP_DIRECT	GO:0006956~complement activation	6	8.08e-05	0.00775614	COLEC11, FCN3, C6, C7, C8B, C8A
GOTERM_BP_DIRECT	GO:0007059~chromosome segregation	10	9.82e-05	0.00908935	TOP2A, CENPE, CENPW, NUF2, TTK, OIP5, NEK2, NDC80, DLGAP5, SPC25
GOTERM_BP_DIRECT	GO:0071377~cellular response to glucagon stimulus	5	0.000108	0.00965969	GJB2, CPS1, ARG1, PCK1, ASS1
GOTERM_BP_DIRECT	GO:0019835~cytolysis	6	0.000136	0.0113462	C6, C7, C9, LYZ, C8B, C8A
GOTERM_BP_DIRECT	GO:0031638~zymogen activation	6	0.000136	0.0113462	F9, C1R, CD5L, C1RL, KLKB1, HGFAC
GOTERM_BP_DIRECT	GO:0000050~urea cycle	5	0.000159	0.0128737	SLC25A15, CPS1, ARG1, ASS1, OTC
GOTERM_BP_DIRECT	GO:0008203~cholesterol metabolic process	10	0.000197	0.0152916	CYP2C9, SQLE, CETP, LIPC, PON1, CYP1A2, APOF, LCAT, CYP3A4, SULT2A1
GOTERM_BP_DIRECT	GO:0010043~response to zinc ion	7	0.000201	0.0152916	CPS1, CA2, ARG1, HAMP, S100A8, ASS1, OTC
GOTERM_BP_DIRECT	GO:0051310~metaphase plate congression	5	0.000225	0.0166685	CENPE, KIF2C, FAM83D, NDC80, GEM
GOTERM_BP_DIRECT	GO:0046483~heterocycle metabolic process	4	0.000288	0.0207507	CYP1A2, CYP2E1, CYP2C19, CYP3A4
GOTERM_BP_DIRECT	GO:0000278~mitotic cell cycle	13	0.000312	0.0218681	CENPW, HGF, BUB1B, TUBE1, KIF11, NDC80, GEM, AURKA, CENPE, TPX2, KIF18B, PBK, NEK2
GOTERM_BP_DIRECT	GO:0000079~regulation of cyclin-dependent protein serine/threonine kinase activity	8	0.000321	0.0218879	DIRAS3, CCNB2, CCNB1, CDKN2C, CCNE2, CDKN2A, GADD45A, CDKN3
GOTERM_BP_DIRECT	GO:0045471~response to ethanol	12	0.000379	0.0248978	NQO1, RGS2, SPINK1, HPGD, SLC10A1, CDK1, CYP2E1, PPARA, HAMP, S100A8, FGFR2, ADH6
GOTERM_BP_DIRECT	GO:0061844~antimicrobial humoral immune response mediated by antimicrobial peptide	11	0.000387	0.0248978	CXCL6, REG3A, CXCL12, TSLP, CCL20, DEFB1, ANG, CCL19, CXCL2, HAMP, CXCL14
GOTERM_BP_DIRECT	GO:0007094~mitotic spindle assembly checkpoint	6	0.000396	0.0248978	TPR, BUB1B, TTK, TRIP13, BUB1, ZWINT
GOTERM_BP_DIRECT	GO:0051382~kinetochore assembly	5	0.000413	0.0248978	CENPE, CENPW, CENPK, CENPA, DLGAP5
GOTERM_BP_DIRECT	GO:0070989~oxidative demethylation	5	0.000413	0.0248978	CYP2C9, CYP2C8, CYP3A43, CYP1A2, CYP3A4
GOTERM_BP_DIRECT	GO:0050830~defense response to Gram-positive bacterium	11	0.000594	0.0349516	FCN2, PGLYRP2, STAB2, HMGB2, DEFB1, ANG, ZG16, LYZ, HAMP, EPHA2, MBL2
GOTERM_BP_DIRECT	GO:0006957~complement activation, alternative pathway	5	0.000693	0.0390274	C7, C9, C8B, CFP, C8A
GOTERM_BP_DIRECT	GO:0022900~electron transport chain	8	0.000693	0.0390274	DMGDH, AKR7A3, GLDC, CYP1A2, RDH16, ETFDH, PHGDH, COX7B2
GOTERM_BP_DIRECT	GO:0051256~mitotic spindle midzone assembly	4	0.000778	0.0428773	RACGAP1, PRC1, KIF4A, KIF23
GOTERM_BP_DIRECT	GO:0071356~cellular response to tumor necrosis factor	12	0.000804	0.0434095	CCL14, CRHBP, ZFP36, CCL20, CCL5, LCN2, CCL2, CCL19, PCK1, TDGF1, HAMP, ASS1
GOTERM_CC_DIRECT	GO:0005576~extracellular region	121	2.04e-19	7.6e-17	FCN2, CDA, FCN3, PGLYRP2, CLEC4M, DEFB1, IL1RAP, CNDP1, CRHBP, LIPC, BMPER, NRCAM, IL13RA2, PAMR1, HABP2, HGF, IGFBP3, SERPINF2, DKK1, FNDC5, COL4A1, CD109, FETUB, SPARCL1, MASP2, IGFALS, LPA, MXRA5, S100A8, EPHA3, LY6E, CETP, REG3A, PROZ, A1BG, CFP, FBLN5, PLAC8, HPX, C6, C7, C9, TSLP, IGF2, PRG4, IGF1, LYZ, CP, INHBE, VNN1, AKR1B10, CXCL12, LCN2, CNTN3, CNTN4, SHBG, FGF13, TDGF1, HAMP, FGFR2, C…
GOTERM_CC_DIRECT	GO:0005615~extracellular space	107	2.82e-16	5.25e-14	FCN2, FCN3, DEFB1, CXCL14, ENO3, CRHBP, LIPC, BMPER, C1RL, IL13RA2, HABP2, CCBE1, HGF, IGFBP3, SERPINF2, KMO, DKK1, ALDH3A1, COL4A1, CD109, FETUB, SPARCL1, MASP2, IGFALS, ZG16, LPA, S100A8, CETP, REG3A, PROZ, A1BG, CD1D, CFP, FBLN5, HPX, PODXL, C9, APOF, PROM1, TSLP, IGF2, PRG4, IGF1, LYZ, CP, INHBE, LCN2, SERPINI1, TDGF1, HAMP, CXCL6, ECM1, COL14A1, LECT2, HMGB2, HBB, HSPB1, DBH, CXCL2, C8A, SER…
GOTERM_CC_DIRECT	GO:0070062~extracellular exosome	105	2.72e-11	3.38e-09	CYFIP2, FCN2, PGLYRP2, ACSM1, DEFB1, ENO3, AKR7A3, BASP1, C1RL, SLC39A5, SPINK1, SERPINF2, ACSL4, LIFR, FOLH1, FETUB, MASP2, IGFALS, MXRA5, HPD, SLC27A2, S100A8, FREM2, GPM6A, CETP, SLC26A2, ABCB4, PROZ, A1BG, FBLN5, ADH6, HPX, C6, RACGAP1, C7, PODXL, PRKAR2B, C9, PROM1, PCK1, EPHX2, GREB1, LYZ, CP, BHMT, CXCL12, LCN2, CDK1, SERPINI1, SHBG, ECM1, DPYS, PZP, HBB, HSPB1, C8B, C8A, SERPINA7, FTCD, S…
GOTERM_CC_DIRECT	GO:0072562~blood microparticle	22	4.81e-11	4.47e-09	FGA, FCN2, BCHE, ITIH4, FCN3, C1R, ACSM1, SERPINF2, PZP, PON1, CD5L, AFM, HBB, PLG, A1BG, HBA1, CP, C8A, HPX, C9, C1RL, CFHR3
GOTERM_CC_DIRECT	GO:0005819~spindle	17	4.71e-07	3.51e-05	HSPB1, BUB1B, TTK, KIF23, KIF11, HMMR, SHCBP1, AURKA, CDC20, ASPM, TPX2, RACGAP1, PRC1, NUSAP1, KIF2C, KIF20A, FAM83D
GOTERM_CC_DIRECT	GO:0000775~chromosome, centromeric region	11	2.69e-06	0.000167	TOP2A, CENPU, CENPE, HELLS, CENPW, NUF2, CENPK, OIP5, KIF2C, CENPA, NDC80
GOTERM_CC_DIRECT	GO:0000776~kinetochore	15	9.2e-06	0.000489	CENPU, CENPW, BUB1B, TTK, CENPA, NDC80, ZWINT, CENPE, TPR, CENPK, NUF2, NEK2, KIF2C, BUB1, SPC25
GOTERM_CC_DIRECT	GO:0005579~membrane attack complex	5	1.15e-05	0.000533	C6, C7, C9, C8B, C8A
GOTERM_CC_DIRECT	GO:0034364~high-density lipoprotein particle	7	3.87e-05	0.00160137	CETP, LIPC, SAA4, PON1, APOF, LCAT, APOA5
GOTERM_CC_DIRECT	GO:0005581~collagen trimer	11	8.87e-05	0.0033	COLEC11, FCN2, MARCO, CCBE1, FCN3, COLEC10, COL15A1, COL4A1, COL14A1, CTHRC1, MBL2
GOTERM_CC_DIRECT	GO:0030496~midbody	15	0.000146	0.00493864	KIF23, SHCBP1, GEM, AURKA, ASPM, CENPE, ANLN, RACGAP1, PRC1, KIF4A, CDK1, NEK2, KIF20A, ECT2, CEP55
GOTERM_CC_DIRECT	GO:0005759~mitochondrial matrix	23	0.000232	0.00720559	DMGDH, GCDH, OAT, ACSM3, CDKN2A, AGXT2, GLDC, AADAT, GPT2, ACSM1, ETFDH, OGDHL, GLYAT, HOGA1, ACADSB, ETNPPL, GSTZ1, CCNB1, ACADL, CPS1, CDK1, BCO2, OTC
GOTERM_CC_DIRECT	GO:0031089~platelet dense granule lumen	5	0.000286	0.00819403	ITIH4, ECM1, CDC37L1, SPP2, SERPINA4
GOTERM_CC_DIRECT	GO:0005874~microtubule	20	0.000403	0.0107209	TUBE1, KIF23, KIF11, AURKA, CENPE, CRHBP, TPX2, EML6, KIF18B, RACGAP1, BAG2, FEZ1, FAM110C, KIF4A, TBCE, NUSAP1, NEK2, KIF2C, KIF20A, FGF13
GOTERM_CC_DIRECT	GO:0072686~mitotic spindle	11	0.000624	0.0154742	TPX2, RACGAP1, TPR, NUSAP1, CDK1, KIF23, CDC7, KIF11, ECT2, FAM83D, GEM
GOTERM_CC_DIRECT	GO:0005737~cytoplasm	163	0.00096	0.0223227	DMGDH, PAGE4, CYFIP2, CLEC4M, PANK1, MT1M, BUB1B, MT1X, RGS2, ZFP36, MT2A, AKR7A3, PTTG1, BASP1, NUSAP1, MAGEA1, NEK2, KPNA2, PHLDA1, IER2, MT1HL1, SULT2A1, ARRDC4, SPINK1, ACSL4, ANXA10, RBP7, ALDH3A1, EML6, FOLH1, MELK, CCNE2, LGSN, FEZ1, RRAGD, MT1F, MT1G, MT1H, CYP2E1, SPATA18, ZFPM2, IDO2, TRIB1, GTSF1, CFTR, SKAP1, KANK4, MT1E, REG3A, ABCB4, NCAPG, HMMR, CD1D, CYP2C19, CYP2C18, ACMSD, SOCS2…
GOTERM_CC_DIRECT	GO:0005694~chromosome	16	0.00103692	0.0226903	IL33, MCM8, KDM8, HMGB2, HOXA13, RAD51AP1, CENPE, MSH2, PRC1, KIF4A, NUSAP1, MCM3, ANG, TRIP13, MCM6, DTL
GOTERM_CC_DIRECT	GO:0097149~centralspindlin complex	3	0.00174675	0.0360995	RACGAP1, KIF23, ECT2
GOTERM_MF_DIRECT	GO:0016705~oxidoreductase activity, acting on paired donors, with incorporation or reduction of molecular oxygen	17	1.11e-12	9.35e-10	PTGIS, CYP4F2, CYP4A11, CYP3A43, CYP3A4, CYP2C19, CYP8B1, CYP2C18, CYP39A1, CYP2C9, CYP26A1, CYP2A6, CYP2C8, CYP2B6, CYP4V2, CYP2E1, KLKB1
GOTERM_MF_DIRECT	GO:0004497~monooxygenase activity	18	6.6e-12	2.77e-09	PTGIS, CYP4F2, CYP4A11, CYP3A43, CYP3A4, CYP2C19, CYP8B1, CYP2C18, CYP39A1, CYP2C9, CYP26A1, CYP2A6, CYP2C8, CYP2B6, CYP4V2, CYP1A2, CYP2E1, KLKB1
GOTERM_MF_DIRECT	GO:0020037~heme binding	23	4.04e-11	1.13e-08	PTGIS, CYP4F2, CYP4A11, CYP3A43, HBB, HBA1, CYP3A4, CYP2C19, CYP8B1, CYP2C18, CYP39A1, CYP2C9, CYP26A1, CYP2A6, CYP2C8, CYP2B6, TDO2, CYP4V2, CYP1A2, FLVCR1, CYP2E1, IDO2, KLKB1
GOTERM_MF_DIRECT	GO:0005506~iron ion binding	21	5.77e-10	1.21e-07	PTGIS, CYP4F2, CYP4A11, CYP3A43, BBOX1, HBA1, CYP3A4, CYP2C19, CYP8B1, CYP2C18, CYP39A1, CYP2C9, CYP26A1, CYP2A6, CYP2C8, CYP2B6, CYP4V2, CYP1A2, LCN2, CYP2E1, KLKB1
GOTERM_MF_DIRECT	GO:0070330~aromatase activity	11	1.47e-09	2.47e-07	CYP2C9, CYP2C8, CYP2B6, CYP4F2, CYP3A43, CYP1A2, CYP4A11, CYP2E1, CYP2C19, CYP3A4, CYP2C18
GOTERM_MF_DIRECT	GO:0008392~arachidonic acid epoxygenase activity	9	3.55e-09	4.96e-07	CYP2C9, CYP2C8, CYP2A6, CYP2B6, CYP4F2, CYP4A11, CYP2E1, CYP2C19, CYP2C18
GOTERM_MF_DIRECT	GO:0016491~oxidoreductase activity	25	5.43e-09	6.51e-07	DMGDH, HPGD, ADH1C, ADH1B, ETFDH, CYP2C19, CYP3A4, ADH6, IYD, HSD17B2, PHGDH, HAO2, RRM2, SRD5A2, TXNRD1, DHRS1, CP, CYP2C9, ALDH3A1, CYP26A1, BDH2, TP53I3, CYP1A2, CYP2E1, SLC27A5
GOTERM_MF_DIRECT	GO:0008395~steroid hydroxylase activity	10	1.01e-07	1.06e-05	CYP39A1, CYP2C9, CYP2C8, CYP2A6, CYP2B6, CYP3A43, CYP2E1, CYP2C19, CYP3A4, CYP2C18
GOTERM_MF_DIRECT	GO:0016712~oxidoreductase activity, acting on paired donors, with incorporation or reduction of molecular oxygen, reduced flavin or flavoprotein as one donor, and incorporation of one atom of oxygen	9	1.86e-07	1.73e-05	CYP2C9, CYP2C8, CYP2A6, CYP2B6, CYP1A2, CYP2E1, CYP2C19, CYP3A4, CYP2C18
GOTERM_MF_DIRECT	GO:0019825~oxygen binding	9	2.87e-06	0.000241	CYP26A1, TDO2, HBB, CYP2E1, HBA1, CYP2C19, CYP3A4, CYP2C18, CYP8B1
GOTERM_MF_DIRECT	GO:0004745~retinol dehydrogenase activity	7	5.68e-06	0.000434	ADH4, ADH1C, ADH1B, ADH1A, RDH16, AKR1C3, ADH6
GOTERM_MF_DIRECT	GO:0004024~alcohol dehydrogenase activity, zinc-dependent	5	1.42e-05	0.000989	ADH4, ADH1C, ADH1B, ADH1A, ADH6
GOTERM_MF_DIRECT	GO:0008009~chemokine activity	9	3.72e-05	0.00240082	CCL14, CXCL6, CXCL12, CCL20, CCL5, CCL2, CCL19, CXCL2, CXCL14
GOTERM_MF_DIRECT	GO:0034875~caffeine oxidase activity	4	6.61e-05	0.00396054	CYP2C9, CYP2C8, CYP1A2, CYP3A4
GOTERM_MF_DIRECT	GO:0004866~endopeptidase inhibitor activity	8	0.000119	0.00664645	ITIH4, SPINK1, CD109, SERPINF2, PZP, FETUB, SPP2, LPA
GOTERM_MF_DIRECT	GO:0005537~mannose binding	6	0.000251	0.0131743	COLEC11, COLEC10, CLEC4M, MRC1, CLEC4G, MBL2
GOTERM_MF_DIRECT	GO:0004467~long-chain fatty acid-CoA ligase activity	5	0.000468	0.0231204	ACSL1, ACSM1, ACSL4, SLC27A2, SLC27A5
GOTERM_MF_DIRECT	GO:0003824~catalytic activity	12	0.000608	0.0270252	RCL1, BCHE, HAL, LGSN, AADAT, GPT2, SLC3A1, DBH, CLYBL, FTCD, ETNPPL, SULF2
GOTERM_MF_DIRECT	GO:0030021~extracellular matrix structural constituent conferring compression resistance	5	0.000612	0.0270252	LUM, BGN, PRG4, DCN, ASPN
GOTERM_MF_DIRECT	GO:1990939~ATP-dependent microtubule motor activity	7	0.000666	0.0273506	CENPE, KIF18B, KIF4A, KIF23, KIF2C, KIF20A, KIF11
GOTERM_MF_DIRECT	GO:0030170~pyridoxal phosphate binding	8	0.000685	0.0273506	SDS, OAT, AGXT2, GLDC, AADAT, CTH, GPT2, ETNPPL
GOTERM_MF_DIRECT	GO:0101020~estrogen 16-alpha-hydroxylase activity	4	0.000857	0.032667	CYP2C8, CYP3A43, CYP1A2, CYP3A4
GOTERM_MF_DIRECT	GO:0005324~long-chain fatty acid transporter activity	5	0.000988	0.036037	FABP1, FABP5, SLC27A2, SLC27A5, MFSD2A
GOTERM_MF_DIRECT	GO:0004252~serine-type endopeptidase activity	14	0.00136209	0.0476163	C1R, HGF, CD5L, PROZ, PLG, MMP12, F9, C1RL, MASP2, LPA, PAMR1, KLKB1, HGFAC, HABP2
KEGG_PATHWAY	hsa01100:Metabolic pathways	99	4.28e-10	1.1e-07	DMGDH, CDA, ACSM3, PANK1, GLDC, ACSM1, OGDHL, GBA3, ENO3, CNDP1, LIPC, TDO2, SDS, ACSL1, GPT2, ACOT12, ACSL4, HOGA1, KMO, ALDH3A1, FOLH1, CYP2E1, IDO2, HPD, SLC27A5, GCDH, NNMT, GLYAT, CYP2C19, CYP2C18, ADH6, ACMSD, ADH4, CYP2B6, RDH16, HAO1, SMYD3, PCK1, HAO2, SRD5A2, AGXT2, EPHX2, CYP4F2, ACADSB, COX7B2, CYP2C9, CYP26A1, SQLE, CYP2C8, BHMT, HAL, VNN1, AKR1B10, CPS1, NAT2, CYP1A2, EZH2, MOGAT2, …
KEGG_PATHWAY	hsa00982:Drug metabolism - cytochrome P450	15	1.65e-07	2.11e-05	ADH1C, ADH1B, ADH1A, CYP3A4, CYP2C19, ADH6, CYP2C9, ALDH3A1, ADH4, CYP2A6, CYP2C8, CYP2B6, CYP1A2, GSTA1, CYP2E1
KEGG_PATHWAY	hsa00980:Metabolism of xenobiotics by cytochrome P450	15	4.67e-07	3.62e-05	ADH1C, ADH1B, ADH1A, CYP3A4, ADH6, CYP2C9, ALDH3A1, ADH4, CYP2A6, AKR7A3, CYP2B6, CYP1A2, GSTA1, CYP2E1, SULT2A1
KEGG_PATHWAY	hsa00830:Retinol metabolism	14	5.66e-07	3.62e-05	ADH1C, ADH1B, ADH1A, CYP3A4, CYP2C18, ADH6, CYP2C9, CYP26A1, ADH4, CYP2A6, CYP2C8, CYP2B6, CYP1A2, RDH16
KEGG_PATHWAY	hsa04610:Complement and coagulation cascades	15	1.39e-06	7.1e-05	FGA, C1R, SERPINF2, PLG, C8B, C8A, SERPINA5, F9, C6, C7, C9, CFHR3, MASP2, KLKB1, MBL2
KEGG_PATHWAY	hsa00071:Fatty acid degradation	10	1.5e-05	0.000638	ADH4, GCDH, ACADL, ADH1C, ACSL1, ADH1B, ADH1A, ACSL4, ACADSB, ADH6
KEGG_PATHWAY	hsa05204:Chemical carcinogenesis - DNA adducts	12	2.63e-05	0.000908	CYP2C9, CYP2C8, CYP2A6, NAT2, CYP3A43, CYP1A2, GSTA1, CYP2E1, CYP2C19, CYP3A4, CYP2C18, SULT2A1
KEGG_PATHWAY	hsa00350:Tyrosine metabolism	9	2.84e-05	0.000908	GSTZ1, ALDH3A1, ADH4, ADH1C, ADH1B, ADH1A, DBH, HPD, ADH6
KEGG_PATHWAY	hsa04110:Cell cycle	16	3.52e-05	0.00100254	CDKN2C, GADD45B, CDKN2A, GADD45A, BUB1B, TTK, CDC7, CDC20, CCNB2, CCNB1, CCNE2, PTTG1, MCM3, CDK1, MCM6, BUB1
KEGG_PATHWAY	hsa03320:PPAR signaling pathway	12	5.84e-05	0.00149466	FABP1, ACADL, FABP5, ACSL1, ACSL4, PLIN2, PCK1, PPARA, APOA5, SLC27A2, CYP8B1, SLC27A5
KEGG_PATHWAY	hsa00380:Tryptophan metabolism	9	9.2e-05	0.00214057	GCDH, TDO2, AADAT, CYP1A2, ALDH8A1, KMO, IDO2, INMT, ACMSD
KEGG_PATHWAY	hsa04115:p53 signaling pathway	11	0.000226	0.00483042	CCNB2, CCNB1, RRM2, TP53I3, GADD45B, CCNE2, CDKN2A, GADD45A, IGFBP3, CDK1, IGF1
KEGG_PATHWAY	hsa04976:Bile secretion	12	0.000281	0.00519005	CA2, SLC10A1, ABCB4, SLC22A1, SLCO1B3, KCNN2, SLC51A, ADCY1, CYP3A4, SLC27A5, CFTR, SULT2A1
KEGG_PATHWAY	hsa01230:Biosynthesis of amino acids	11	0.000284	0.00519005	SDS, CPS1, ARG1, CTH, GPT2, PHGDH, ALDOB, TKT, ENO3, ASS1, OTC
KEGG_PATHWAY	hsa00260:Glycine, serine and threonine metabolism	8	0.00044	0.00751023	DMGDH, BHMT, SDS, AGXT2, GLDC, CTH, PHGDH, GNMT
KEGG_PATHWAY	hsa00010:Glycolysis / Gluconeogenesis	10	0.000539	0.00862626	ALDH3A1, ADH4, ADH1C, ADH1B, ADH1A, ALDOB, PCK1, FBP1, ENO3, ADH6
KEGG_PATHWAY	hsa00590:Arachidonic acid metabolism	9	0.00128255	0.0193136	CYP2C9, CYP2C8, CYP2B6, PTGIS, CYP4F2, EPHX2, AKR1C3, CYP2E1, CYP2C19
KEGG_PATHWAY	hsa01200:Carbon metabolism	12	0.0024267	0.0345131	SDS, CPS1, GLDC, GPT2, PHGDH, OGDHL, HAO1, ALDOB, TKT, FBP1, HAO2, ENO3
KEGG_PATHWAY	hsa00591:Linoleic acid metabolism	6	0.00315939	0.0425687	CYP2C9, CYP2C8, CYP1A2, CYP2E1, CYP2C19, CYP3A4
GO, Gene Ontology; KEGG, Kyoto Encyclopedia of Genes and Genomes.
